# Supplementary material
Source: ML conference proceedings conference paper supplement (https://proceedings.mlr.press/v37/foulds15.html)
Supplement: Supplementary file 1 [file foulds15-supp.pdf]

---

## Latent Topic Networks - Supplementary Material

---

### 1. Additional Results for the State of the Union Model

In this supplement, we present time-series plots of all topics for the State of the Union model. The plots show the topic proportions for the latent state of the Union (SOTU) and party biases for each of the 20 topics, as they vary between 1790 and 2015.

The plots reveal several interesting patterns in addition to the conservative, liberal, war, and nationalism topics discussed in the main paper (Topics 16, 17, 19, and 13, respectively). For example, peaks in the proportion of the latent SOTU variable identify the great depression (Topic 5), the Spanish–American War (Topic 7), the Civil War (Topic 10) and the Mexican-American War (Topic 12).

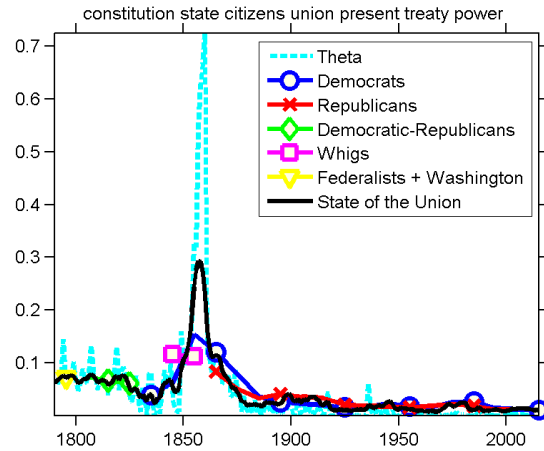

Topic 2.

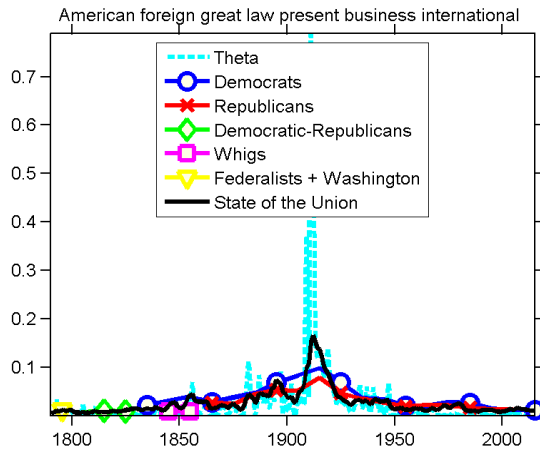

Topic 1.

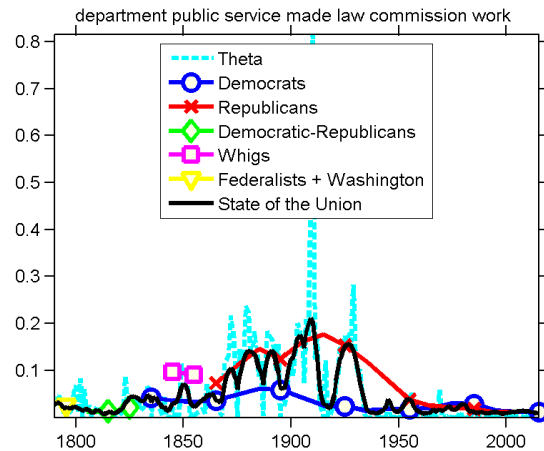

Topic 3.

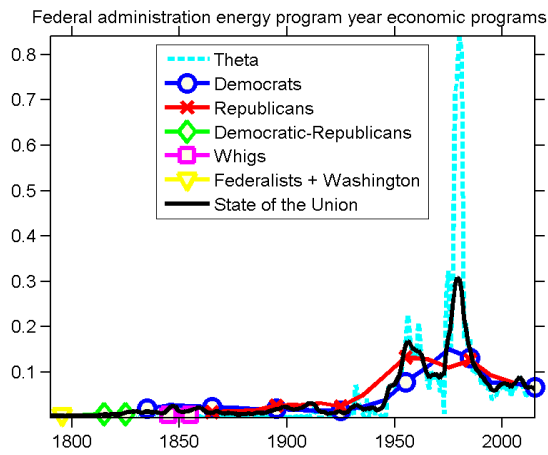

Topic 4.

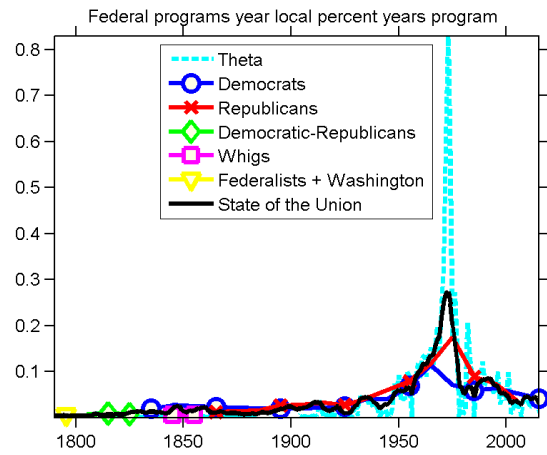

Topic 6.

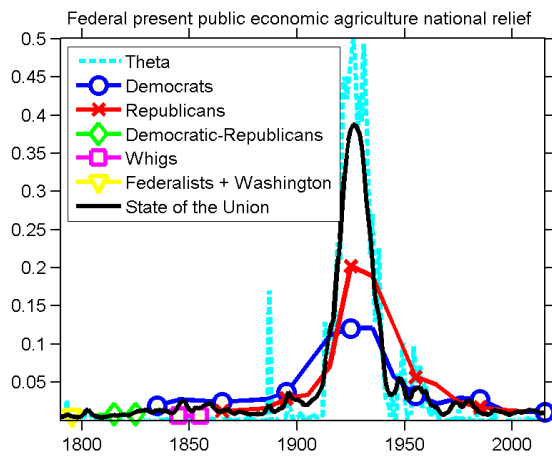

Topic 5.

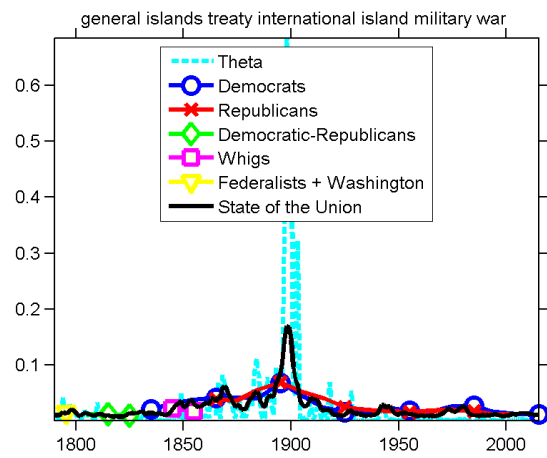

Topic 7.

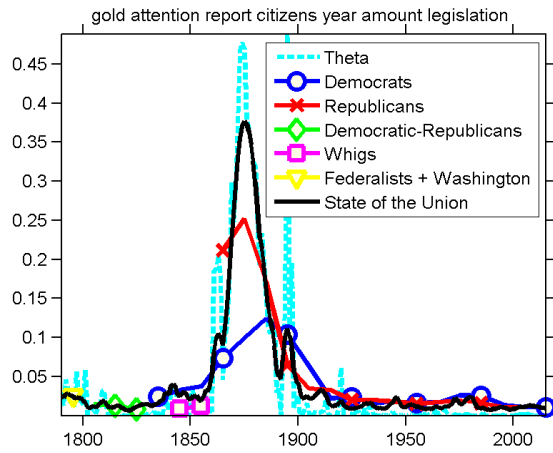

Topic 8.

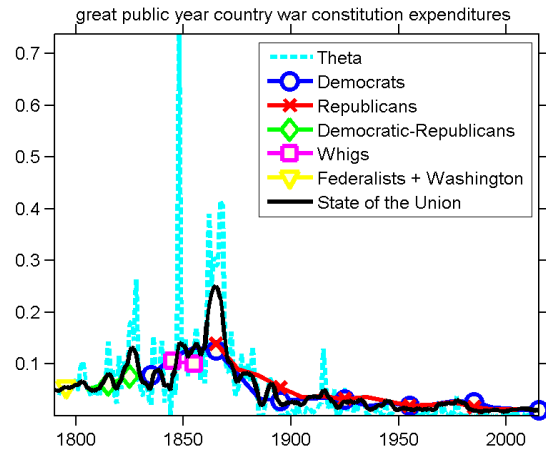

Topic 10.

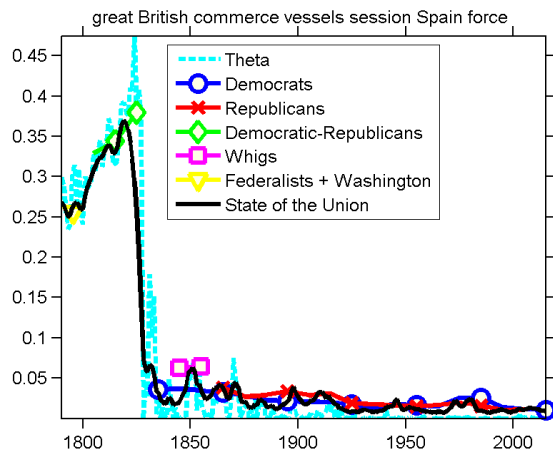

Topic 9.

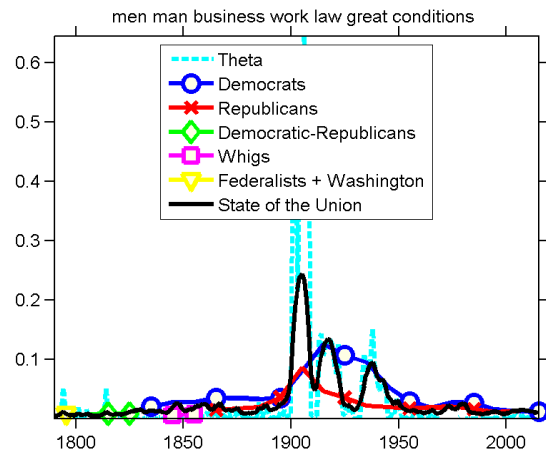

Topic 11.

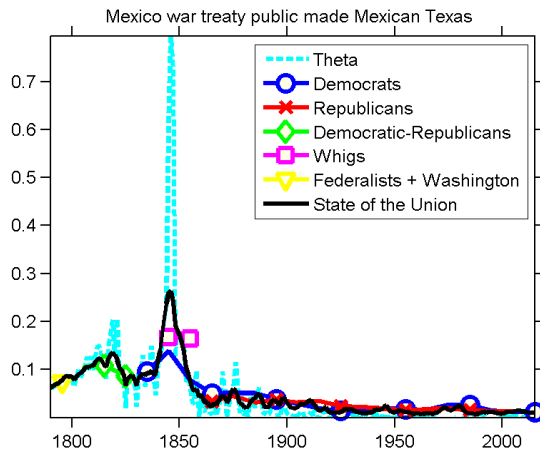

Topic 12.

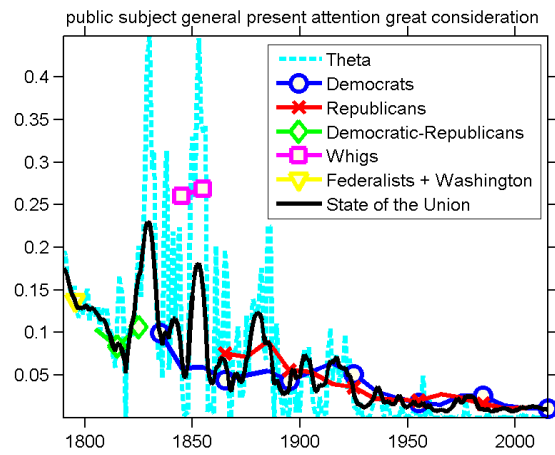

Topic 14.

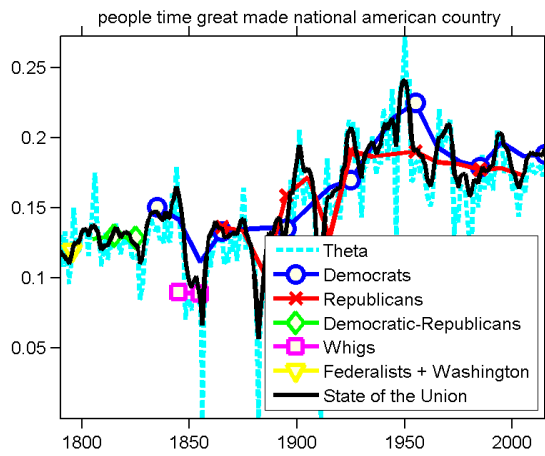

Topic 13.

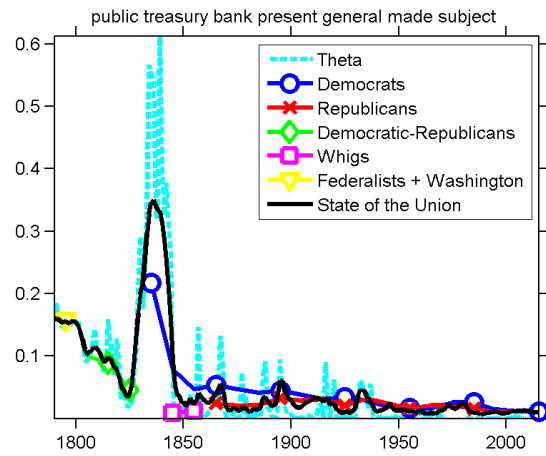

Topic 15.

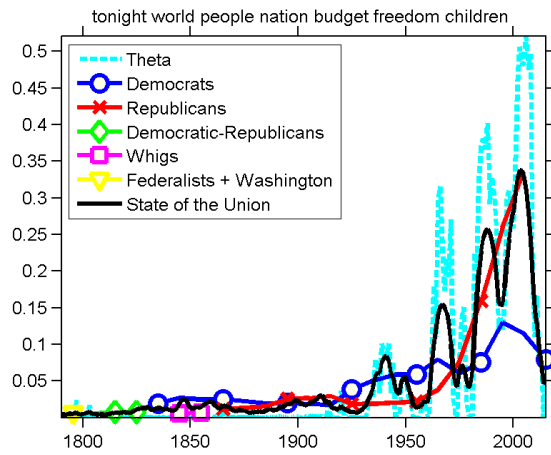

Topic 16.

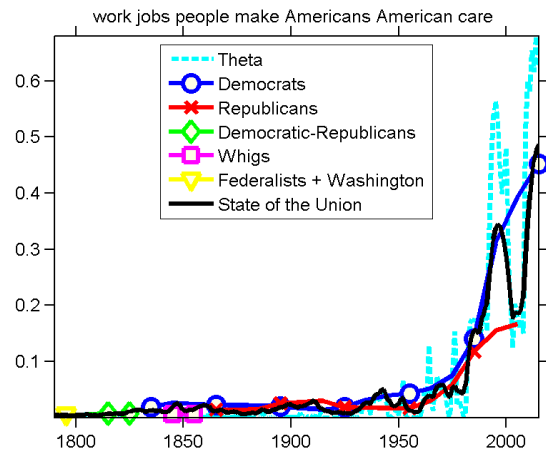

Topic 18.

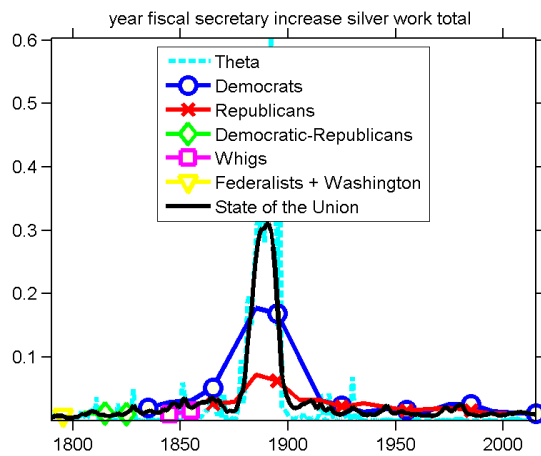

Topic 17.

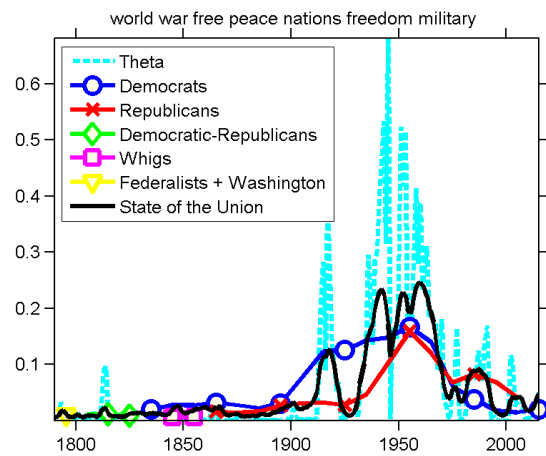

Topic 19.

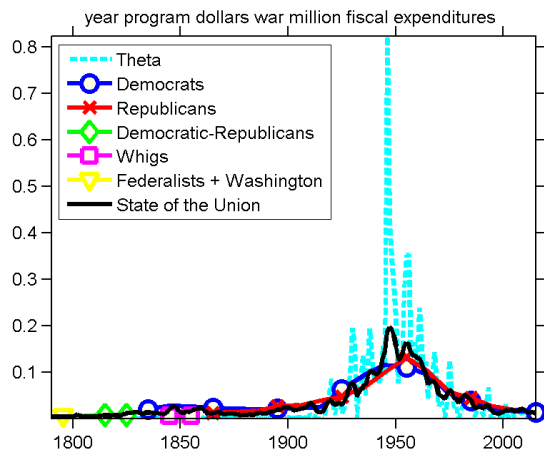

Topic 20.
